# Supplementary material
Source: PubMed Central journal article supplement (PMC4807488)
Supplement: IAI.01461-15_zii999091659so1.pdf [file IAI.01461-15_zii999091659so1.pdf]

## SUPPLEMENTARY DATA

### Differences in Host Cell Invasion and SPI-1 Expression between *Salmonella enterica* serovar Paratyphi A and the Non-Typhoidal Serovar Typhimurium

**Table S1. Bacterial strains and plasmids used in the study.**

| Strain or plasmid                        | Genotype and description                       | Reference or source |
|------------------------------------------|------------------------------------------------|---------------------|
| <i>S. Typhimurium</i> LT2                |                                                | SGSC                |
| <i>S. Typhimurium</i> 14028s             |                                                | SGSC                |
| <i>S. Typhimurium</i> SL1344             | wild type Sm <sup>r</sup> <i>xyl hisG rpsL</i> | SGSC                |
| <i>S. Typhimurium</i> SL1344 <i>invA</i> | $\Delta invA$                                  | (1)                 |
| <i>S. Typhimurium</i> SL1344 <i>invG</i> | $\Delta invG$                                  | (1)                 |
| <i>S. Typhimurium</i> 73727              | Clinical isolate 2002                          | Human stool         |
| <i>S. Typhimurium</i> 74701              | Clinical isolate 2002                          | Human stool         |
| <i>S. Typhimurium</i> 80609              | Clinical isolate 2002                          | Human stool         |
| <i>S. Typhimurium</i> 82788              | Clinical isolate 2003                          | Human stool         |
| <i>S. Typhimurium</i> 88359              | Clinical isolate 2003                          | Human stool         |
| <i>S. Typhimurium</i> 88894              | Clinical isolate 2004                          | Human stool         |
| <i>S. Typhimurium</i> 92273              | Clinical isolate 2004                          | Human stool         |
| <i>S. Typhimurium</i> 92280              | Clinical isolate 2004                          | Human stool         |
| <i>S. Typhimurium</i> 92576              | Clinical isolate 2004                          | Human stool         |
| <i>S. Typhimurium</i> 98666              | Clinical isolate 2006                          | Human blood         |
| <i>S. Typhimurium</i> 103259             | Clinical isolate 2006                          | Human blood         |
| <i>S. Typhimurium</i> 116449             | Clinical isolate 2008                          | Human blood         |
| <i>S. Typhimurium</i> 125904             | Clinical isolate 2009                          | Human stool         |
| <i>S. Paratyphi</i> A 45147              | Outbreak strain                                | (2)                 |
| <i>S. Paratyphi</i> A 45147 <i>invA</i>  | $\Delta invA$                                  | (1)                 |
| <i>S. Paratyphi</i> A 45147 <i>invG</i>  | $\Delta invG$                                  | (1)                 |
| <i>S. Paratyphi</i> A 118239             | Clinical isolate 2008                          | Traveler from India |
| <i>S. Paratyphi</i> A 9150               |                                                | SGSC                |
| <i>S. Paratyphi</i> A AKU 1260           |                                                | SGSC                |
| <i>S. Paratyphi</i> A 83698              | Clinical isolate 2003                          | Traveler from India |

|                               |                                                                                         |                                |
|-------------------------------|-----------------------------------------------------------------------------------------|--------------------------------|
| <i>S. Paratyphi</i> A 83753   | Clinical isolate 2003                                                                   | Traveler from India            |
| <i>S. Paratyphi</i> A 93223   | Clinical isolate 2004                                                                   | Traveler from Romania          |
| <i>S. Paratyphi</i> A 108003  | Clinical isolate 2007                                                                   | Traveler from India            |
| <i>S. Paratyphi</i> A 108599  | Clinical isolate 2007                                                                   | Traveler from India            |
| <i>S. Paratyphi</i> A 124597  | Clinical isolate 2009                                                                   | Traveler from India            |
| <i>S. Paratyphi</i> A 119989  | Clinical isolate 2008                                                                   | Traveler from Thailand & India |
| <i>S. Paratyphi</i> A 113498  | Clinical isolate 2008                                                                   | Traveler from Sri Lanka        |
| <i>S. Paratyphi</i> A 105493  | Clinical isolate 2006                                                                   | Traveler from Thailand & Nepal |
| <i>S. Paratyphi</i> A 51190   | Clinical isolate 2009                                                                   | Traveler from Nepal            |
| <i>S. Paratyphi</i> A 36056/7 | Clinical isolate 2007                                                                   | Traveler from Nepal            |
| <i>S. Paratyphi</i> A 45842/7 | Clinical isolate 2007                                                                   | Traveler from Nepal            |
| Plasmids                      |                                                                                         |                                |
| pKD4                          |                                                                                         | (3)                            |
| pKD46                         |                                                                                         | (3)                            |
| pCP20                         |                                                                                         | (3)                            |
| pWSK29                        |                                                                                         | (4)                            |
| pACYC184                      |                                                                                         | (4)                            |
| pBAD18                        |                                                                                         | (5)                            |
| pDE-hilA <sub>STM</sub>       | <i>S. Typhimurium</i> SL1344 <i>hilA</i> fused to arabinose promoter cloned into pBAD18 | This study                     |
| pDE-sptP::2HA <sub>STM</sub>  | <i>S. Typhimurium</i> SL1344 <i>sptP</i> fused to 2HA tag cloned into pACYC184          | This study                     |
| pDE-sptP::2HA <sub>SPA</sub>  | <i>S. Paratyphi</i> A 45157 <i>sptP</i> fused to 2HA tag cloned into pACYC184           | This study                     |
| pDE-steA::2HA <sub>STM</sub>  | <i>S. Typhimurium</i> SL1344 <i>steA</i> fused to 2HA tag cloned into pWSK29            | This study                     |
| pDE-steA::2HA <sub>SPA</sub>  | <i>S. Paratyphi</i> A 45157 <i>steA</i> fused to 2HA tag cloned into pWSK29             | This study                     |
| pDE-sipB::2HA <sub>STM</sub>  | <i>S. Typhimurium</i> SL1344 <i>sipB</i> fused to 2HA tag cloned into pWSK29            | (6)                            |

|                               |                                                                                          |
|-------------------------------|------------------------------------------------------------------------------------------|
| pDE-sipB::2HA <sub>SPA</sub>  | <i>S. Paratyphi</i> A 45157 <i>sipB</i> fused to 2HA tag cloned into pWSK29 (6)          |
| pDE-sopE2::2HA <sub>STM</sub> | <i>S. Typhimurium</i> SL1344 <i>sopE2</i> fused to 2HA tag cloned into pWSK29 This study |
| pDE-sopE2::2HA <sub>SPA</sub> | <i>S. Paratyphi</i> A 45157 <i>sopE2</i> fused to 2HA tag cloned into pWSK29 This study  |
| pDE-sopB::2HA <sub>STM</sub>  | <i>S. Typhimurium</i> SL1344 <i>sopB</i> fused to 2HA tag cloned into pWSK29 (6)         |
| pDE-sopB::2HA <sub>SPA</sub>  | <i>S. Paratyphi</i> A 45157 <i>sopB</i> fused to 2HA tag cloned into pWSK29 (6)          |
| pDE-prgJ::2HA <sub>STM</sub>  | <i>S. Typhimurium</i> SL1344 <i>prgJ</i> fused to 2HA tag cloned into pACYC184 (6)       |
| pDE-prgJ::2HA <sub>SPA</sub>  | <i>S. Paratyphi</i> A 45157 <i>prgJ</i> fused to 2HA tag cloned into pACYC184 (6)        |

---

SGSC – *Salmonella* genetic Stock Center the University of Calgary.

**Table S2. Primers used in the study.**

| Primer                   | Sequence 5'-3'                  |
|--------------------------|---------------------------------|
| steA 2HA STM/SPA SacI F  | TTTTGAGCTCTAGTCTGTGTTTTTCATTACG |
| steA 2HA STM XbaI R      | TTTTTCTAGAATAATTGTCCAAATAGTTATG |
| steA 2HA SPA XbaI R      | TTTTTCTAGAATACTTGTCTAAATAGTTATG |
| sopE2 2HA STM/SPA SacI F | TTTTGAGCTCTTCCATTTGTTAACCTATTG  |
| sopE2 2HA STM/SPA XbaI R | TTTTTCTAGAGGAGGCATTCTGAAGATAC   |
| sptP 2HA STM/SPA SalI F  | TTTTGTCGACAGTCTTGAGTCCAGGGTGTAG |
| sptP 2HA STM/SPA BglII R | TTTTAGATCTGCTTGCCGTCGTCATAAGC   |
| SDhilA F STM EcorI       | TTTTGAATTTCGAATACACTATTATCATGC  |
| SDhilA R STM XbaI        | TTTTTCTAGATTACCGTAATTTAATCAAGC  |
| rpoD RT-PCR F            | GGTCTGACCATCGAACAGGTG           |
| rpoD RT-PCR R            | ATCAGACCGATGTTGCCTTC            |
| invF RT-PCR F            | TGTCGCACCAGTATCAGGAG            |
| invF RT-PCR R            | ACTCGCAGCGTTTACGATC             |
| invA RT-PCR F            | TCCACGAATATGCTCCACAAG           |
| invA RT-PCR R            | CAGACATGCCACGGTACAAC            |
| sipB RT-PCR F            | GTGGGC AAAAATACGGAAG            |
| sipB RT-PCR R            | CCCGATACATCCCATAAATGC           |
| sopB RT-PCR F            | GAAAATCGGCGCAAAAAGATATC         |
| sopB RT-PCR R            | TCATGATAGGGGGAAAGCAC            |

|                |                      |
|----------------|----------------------|
| sptP RT-PCR F  | CTGAAGCCATCTCCTGGAAG |
| sptP RT-PCR R  | GTCATAAAAGGCGGCGATAC |
| steA RT-PCR F  | GCTTTCTGATGGTCGGATG  |
| steA RT-PCR R  | AAAGCCCTCTTCCAGTCTC  |
| sopE2 RT-PCR F | CCGACTACCCATTTTCATCG |
| sopE2 RT-PCR R | GCTTCGCATGTCTGACGAGC |

**Fig. S1. *S. Paratyphi* A and *S. Typhimurium* show more similar SPI-1 expression pattern under microaerobiosis than under aerobic conditions.** (A) The mean fold change in the expression of 41 SPI-1 genes in *S. Paratyphi* A relative to *S. Typhimurium* is shown for cultures grown to the late logarithmic phase under aerobic conditions and for cultures grown to the stationary phase under microaerobic conditions. Results are based on two independent RNA extractions and the RNA-seq values presented in Table 1. Two-tailed t-test was used to determined statistical significance. (B) RNA was extracted from *S. Paratyphi* A 45157 and *S. Typhimurium* SL1344 grown to the late logarithmic phase aerobically and to the stationary phase under microaerobic growth conditions. qRT-PCR was performed to determine the relative expression of *invA*, *invF*, *sipB*, *sopB* and *sopE2* in *S. Paratyphi* A relative to *S. Typhimurium*. The indicated values present the mean and the SEM of at least three independent RT-PCR experiments.

## REFERENCES

1. Elhadad D, McClelland M, Rahav G, Gal-Mor O. 2015. Feverlike Temperature is a Virulence Regulatory Cue Controlling the Motility and Host Cell Entry of Typhoidal Salmonella. *J Infect Dis* **212**:147-156.
2. Gal-Mor O, Suez J, Elhadad D, Porwollik S, Leshem E, Valinsky L, McClelland M, Schwartz E, Rahav G. 2012. Molecular and cellular characterization of a Salmonella enterica serovar Paratyphi a outbreak strain and the human immune response to infection. *Clin Vaccine Immunol* **19**:146-156.
3. Datsenko KA, Wanner BL. 2000. One-step inactivation of chromosomal genes in Escherichia coli K-12 using PCR products. *Proc Natl Acad Sci U S A* **97**:6640-6645.
4. Wang RF, Kushner SR. 1991. Construction of versatile low-copy-number vectors for cloning, sequencing and gene expression in *Escherichia coli*. *Gene* **100**:195-199.

5. **Guzman LM, Belin D, Carson MJ, Beckwith J.** 1995. Tight regulation, modulation, and high-level expression by vectors containing the arabinose PBAD promoter. *J Bacteriol* **177**:4121-4130.
6. **Elhadad D, Desai P, Rahav G, McClelland M, Gal-Mor O.** 2015. Flagellin Is Required for Host Cell Invasion and Normal Salmonella Pathogenicity Island 1 Expression by *Salmonella enterica* Serovar Paratyphi A. *Infect Immun* **83**:3355-3368.
