# Supplementary material
Source: PubMed Central journal article supplement (PMC4807488)

**A**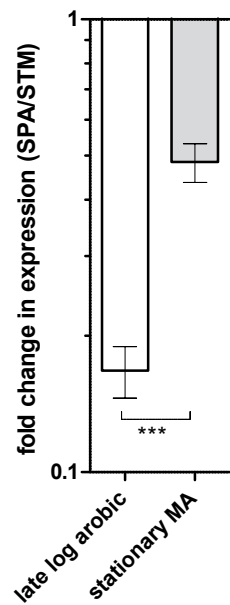**B**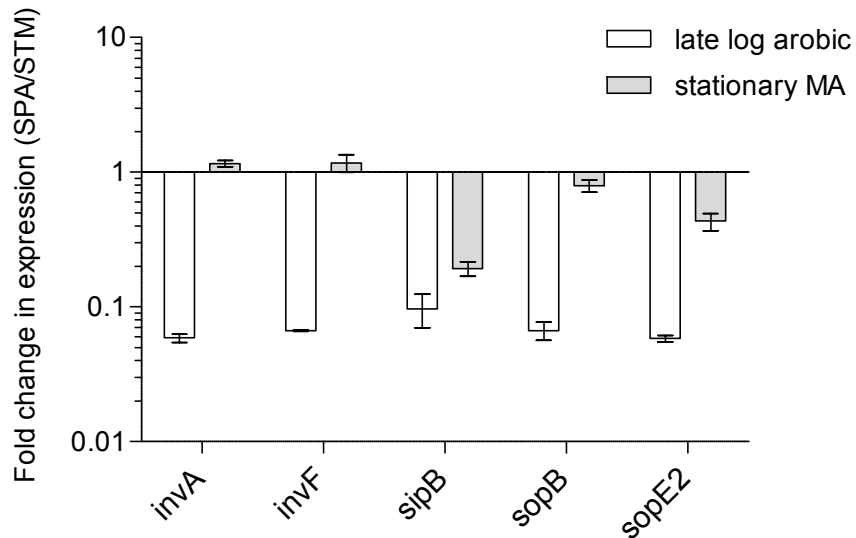

Supplement: IAI.01461-15_zii999091659so2.pdf [file IAI.01461-15_zii999091659so2.pdf]
